# Supplementary material for: Continuous-wave laser annealing of metallic layers for CuInSe2 solar cell applications: effect of preheating treatment on grain growth
Source: Royal Society of Chemistry journal article supplement (doi:10.1039/c9ra06896a), 2020-01-01
Supplement: c9ra06896a1.pdf [file c9ra06896a1.pdf]

## Continuous-wave laser annealing of metallic layers for CuInSe<sub>2</sub> solar cell applications: effect of preheating treatment on grain growth

Panagiota Arnou,<sup>\*a</sup> Alberto Lomuscio,<sup>a</sup> Thomas P. Weiss,<sup>a</sup> Daniel Siopa,<sup>a</sup> Sergio Giraldo,<sup>b</sup> Edgardo Saucedo,<sup>b</sup> Michael A. Scarpulla<sup>c</sup> and Phillip J. Dale<sup>a</sup>

<sup>a</sup>Physics and Materials Science Research Unit, University of Luxembourg, L-4422 Belvaux, Luxembourg

<sup>b</sup>Catalonia Institute for Energy Research (IREC), Spain

<sup>c</sup>Materials Science and Engineering, University of Utah, Salt Lake City, Utah, USA

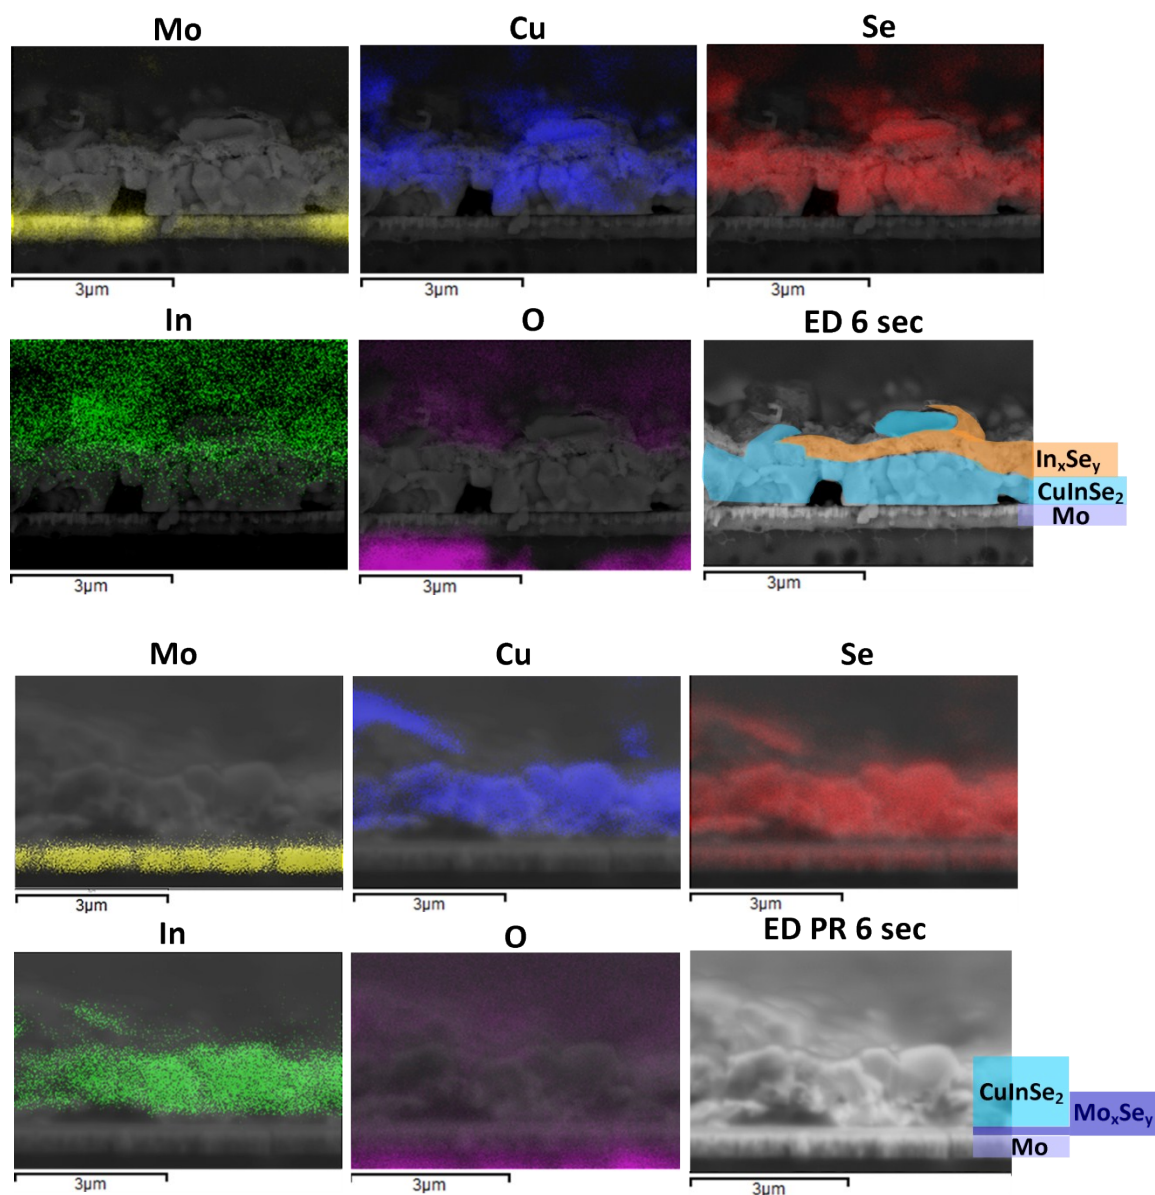

Figure S1: EDS elemental mapping analysis on a cross section SEM image of the ED-LA 6sec sample (top) and ED-PR-LA 6sec sample (bottom) with the elements of interest. A coloured indication for each feature is also included on the SEM image, to label each phase.

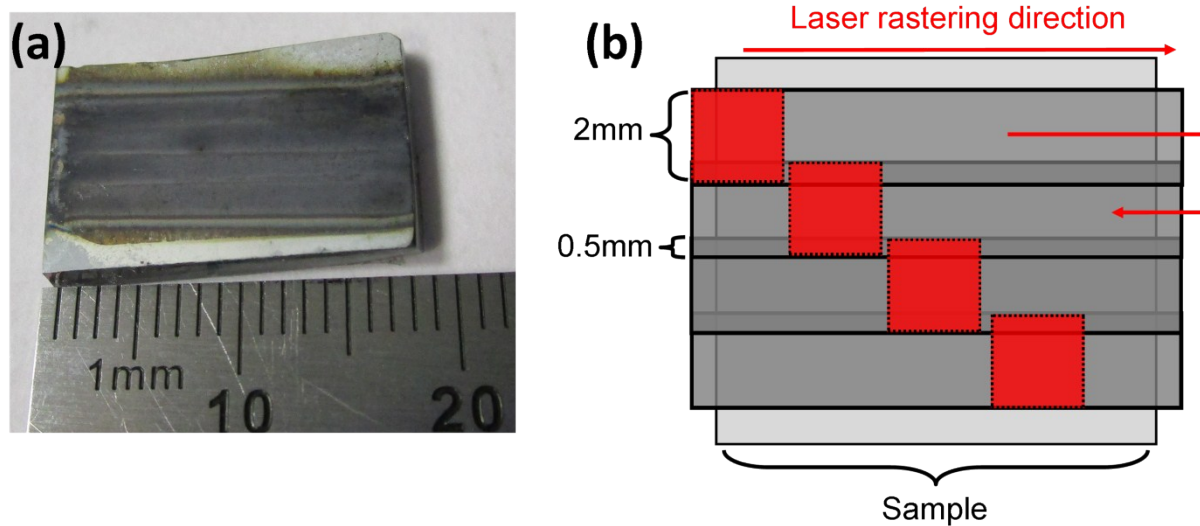

Figure S2: (a) Photograph image of a thin LA-sample (4 sec dwell) which consists of stripes in the direction that the laser is passed. Darker grey areas are expected to have reached higher temperatures during annealing. (b) Illustration of the laser scanning pattern on the sample.
